# Supplementary material
Source: ML conference proceedings conference paper supplement (https://openaccess.thecvf.com/content/ICCV2023/html/Guo_PolicyCleanse_Backdoor_Detection_ICCV_2023_paper.html)
Supplement: Supplementary file 2 [file Guo_PolicyCleanse_Backdoor_Detection_ICCV_2023_supplemental.zip]

Archive with 2 entries (2 files):
- 07247-supp.pdf
- __MACOSX/._07247-supp.pdf
